# Supplementary material for: PNPO–PLP axis senses prolonged hypoxia in macrophages by regulating lysosomal activity
Source: PubMed Central journal article supplement (PMC11599045; doi:10.1038/s42255-024-01053-4), 2024-05-31
Supplement: 42255_2024_1053_MOESM1_ESM.pdf [file 42255_2024_1053_MOESM1_ESM.pdf]

## Reporting Summary

Nature Portfolio wishes to improve the reproducibility of the work that we publish. This form provides structure for consistency and transparency in reporting. For further information on Nature Portfolio policies, see our [Editorial Policies](#) and the [Editorial Policy Checklist](#).

### Statistics

For all statistical analyses, confirm that the following items are present in the figure legend, table legend, main text, or Methods section.

- | n/a                                 | Confirmed                                                                                                                                                                                                                                                                                      |
|-------------------------------------|------------------------------------------------------------------------------------------------------------------------------------------------------------------------------------------------------------------------------------------------------------------------------------------------|
| <input type="checkbox"/>            | <input checked="" type="checkbox"/> The exact sample size ( $n$ ) for each experimental group/condition, given as a discrete number and unit of measurement                                                                                                                                    |
| <input type="checkbox"/>            | <input checked="" type="checkbox"/> A statement on whether measurements were taken from distinct samples or whether the same sample was measured repeatedly                                                                                                                                    |
| <input type="checkbox"/>            | <input checked="" type="checkbox"/> The statistical test(s) used AND whether they are one- or two-sided<br><i>Only common tests should be described solely by name; describe more complex techniques in the Methods section.</i>                                                               |
| <input checked="" type="checkbox"/> | <input type="checkbox"/> A description of all covariates tested                                                                                                                                                                                                                                |
| <input type="checkbox"/>            | <input checked="" type="checkbox"/> A description of any assumptions or corrections, such as tests of normality and adjustment for multiple comparisons                                                                                                                                        |
| <input type="checkbox"/>            | <input checked="" type="checkbox"/> A full description of the statistical parameters including central tendency (e.g. means) or other basic estimates (e.g. regression coefficient) AND variation (e.g. standard deviation) or associated estimates of uncertainty (e.g. confidence intervals) |
| <input type="checkbox"/>            | <input checked="" type="checkbox"/> For null hypothesis testing, the test statistic (e.g. $F$ , $t$ , $r$ ) with confidence intervals, effect sizes, degrees of freedom and $P$ value noted<br><i>Give <math>P</math> values as exact values whenever suitable.</i>                            |
| <input checked="" type="checkbox"/> | <input type="checkbox"/> For Bayesian analysis, information on the choice of priors and Markov chain Monte Carlo settings                                                                                                                                                                      |
| <input checked="" type="checkbox"/> | <input type="checkbox"/> For hierarchical and complex designs, identification of the appropriate level for tests and full reporting of outcomes                                                                                                                                                |
| <input type="checkbox"/>            | <input checked="" type="checkbox"/> Estimates of effect sizes (e.g. Cohen's $d$ , Pearson's $r$ ), indicating how they were calculated                                                                                                                                                         |

*Our web collection on [statistics for biologists](#) contains articles on many of the points above.*

### Software and code

Policy information about [availability of computer code](#)

|                 |                                                                                                                                                                                                                                     |
|-----------------|-------------------------------------------------------------------------------------------------------------------------------------------------------------------------------------------------------------------------------------|
| Data collection | Next generation sequencers: HiSeq 2500 sequencing system, HiSeq X ten system, Mass spectrometry: Q Exactive (IC/HRMS/MS and PFPP-LC/HRMS/MS)                                                                                        |
| Data analysis   | FastQC version 0.11.5, Cutadapt version 1.15, STAR version 2.5.3a, Cufflinks suite version 2.2.1, Enrichr, ggplot2, pheatmap, Rstudio version 2021.09.1+372, GSEA version 4.1.0., LASX software, ImageJ, GraphPad Software Prism 7. |

For manuscripts utilizing custom algorithms or software that are central to the research but not yet described in published literature, software must be made available to editors and reviewers. We strongly encourage code deposition in a community repository (e.g. GitHub). See the Nature Portfolio [guidelines for submitting code & software](#) for further information.

### Data

Policy information about [availability of data](#)

All manuscripts must include a [data availability statement](#). This statement should provide the following information, where applicable:

- Accession codes, unique identifiers, or web links for publicly available datasets
- A description of any restrictions on data availability
- For clinical datasets or third party data, please ensure that the statement adheres to our [policy](#)

RNA-seq data were deposited at GEO (GSE181641, GSE181642, GSE181643).  
GSE181641: <https://www.ncbi.nlm.nih.gov/geo/query/acc.cgi?acc=GSE181641>

GSE181642: <https://www.ncbi.nlm.nih.gov/geo/query/acc.cgi?acc=GSE181642>  
 GSE181643: <https://www.ncbi.nlm.nih.gov/geo/query/acc.cgi?acc=GSE181643>  
 Metabolome data are shown in Supplementary Table 3.  
 mm9 reference genome: [https://www.gencodegenes.org/mouse/release\\_M1.html](https://www.gencodegenes.org/mouse/release_M1.html)

## Research involving human participants, their data, or biological material

Policy information about studies with [human participants or human data](#). See also policy information about [sex, gender \(identity/presentation\), and sexual orientation](#) and [race, ethnicity and racism](#).

|                                                                    |                |
|--------------------------------------------------------------------|----------------|
| Reporting on sex and gender                                        | Not applicable |
| Reporting on race, ethnicity, or other socially relevant groupings | Not applicable |
| Population characteristics                                         | Not applicable |
| Recruitment                                                        | Not applicable |
| Ethics oversight                                                   | Not applicable |

Note that full information on the approval of the study protocol must also be provided in the manuscript.

## Field-specific reporting

Please select the one below that is the best fit for your research. If you are not sure, read the appropriate sections before making your selection.

Life sciences  Behavioural & social sciences  Ecological, evolutionary & environmental sciences

For a reference copy of the document with all sections, see [nature.com/documents/nr-reporting-summary-flat.pdf](https://nature.com/documents/nr-reporting-summary-flat.pdf)

## Life sciences study design

All studies must disclose on these points even when the disclosure is negative.

|                 |                                                                                                                                                                                                                                                                                                                                                                                                                                                                                                                                                                                                                                                                                                                                                                                                                            |
|-----------------|----------------------------------------------------------------------------------------------------------------------------------------------------------------------------------------------------------------------------------------------------------------------------------------------------------------------------------------------------------------------------------------------------------------------------------------------------------------------------------------------------------------------------------------------------------------------------------------------------------------------------------------------------------------------------------------------------------------------------------------------------------------------------------------------------------------------------|
| Sample size     | In this study, no sample size calculation was performed.<br>For RNA-seq and metabolome analyses, biological duplicates were used for data acquisition. We consider this was sufficient because results obtained from each analysis was verified in alternative experiments. RT-PCR for RNA-seq and VB6 Enzymatic assay kit for metabolome analysis.<br>For RT-PCR and immunoblot analysis of macrophages and cell lines, 3-5 samples were examined. For microscopic observation, 6-7 fields per sample were examined, and independent experiments were repeated for more than 3 times. For mouse experiments, more than 3 or more mice were analyzed considering the individual variation of inbred mouse strain. These sample sizes were chosen based on previous experience and on what is common practice in the field. |
| Data exclusions | No data were excluded.                                                                                                                                                                                                                                                                                                                                                                                                                                                                                                                                                                                                                                                                                                                                                                                                     |
| Replication     | How often the experiments were replicated or performed independently has been described in each figure legend.                                                                                                                                                                                                                                                                                                                                                                                                                                                                                                                                                                                                                                                                                                             |
| Randomization   | For mouse experiment, wild-type C57BL/6N male and female mice were randomly divided into the required number of groups for each experiment.                                                                                                                                                                                                                                                                                                                                                                                                                                                                                                                                                                                                                                                                                |
| Blinding        | Histological evaluation of mouse intestine samples was blindly performed. In other experiments, there is no need to conduct blind tests because the characteristics of objective and quantitative data do not allow room for arbitrary evaluations by the experimenter.                                                                                                                                                                                                                                                                                                                                                                                                                                                                                                                                                    |

## Reporting for specific materials, systems and methods

We require information from authors about some types of materials, experimental systems and methods used in many studies. Here, indicate whether each material, system or method listed is relevant to your study. If you are not sure if a list item applies to your research, read the appropriate section before selecting a response.

## Materials &amp; experimental systems

|                                     |                                     |                               |
|-------------------------------------|-------------------------------------|-------------------------------|
| n/a                                 | <input type="checkbox"/>            | Involvement in the study      |
| <input type="checkbox"/>            | <input checked="" type="checkbox"/> | Antibodies                    |
| <input type="checkbox"/>            | <input checked="" type="checkbox"/> | Eukaryotic cell lines         |
| <input checked="" type="checkbox"/> | <input type="checkbox"/>            | Palaeontology and archaeology |
| <input type="checkbox"/>            | <input checked="" type="checkbox"/> | Animals and other organisms   |
| <input checked="" type="checkbox"/> | <input type="checkbox"/>            | Clinical data                 |
| <input checked="" type="checkbox"/> | <input type="checkbox"/>            | Dual use research of concern  |
| <input checked="" type="checkbox"/> | <input type="checkbox"/>            | Plants                        |

## Methods

|                                     |                          |                          |
|-------------------------------------|--------------------------|--------------------------|
| n/a                                 | <input type="checkbox"/> | Involvement in the study |
| <input checked="" type="checkbox"/> | <input type="checkbox"/> | ChIP-seq                 |
| <input checked="" type="checkbox"/> | <input type="checkbox"/> | Flow cytometry           |
| <input checked="" type="checkbox"/> | <input type="checkbox"/> | MRI-based neuroimaging   |

## Antibodies

## Antibodies used

ChIP assay: anti-H3K27ac antibody (MAB10309, MAB Institute), anti-H3K4me3 antibody (MAB10304, MAB Institute)  
 Immunoblot analysis: anti-TET2 antibody (ab124297, Abcam), KDM5a antibody (ab70892, Abcam), anti-KDM6a antibody (33510S, Cell Signaling), anti-PHD2 antibody (NB100-2219, Novus), anti-Lamp1 antibody (ab25245, Abcam), anti-PNPO antibody (15552-1-AP, Proteintech), anti-Tubulin antibody (T9026, Sigma), anti-HIF-2 $\alpha$  (ab109616, Abcam), anti-p70 S6K (#2708, Cell Signaling Technology), anti-phospho-p70 S6K (#9234, Cell Signaling Technology), anti-pimonidazole (Pab2627, Hypoxyprobe, Inc.).  
 Immunohistochemistry: anti-pimonidazole (Pab2627, Hypoxyprobe, Inc.).

## Validation

<https://www.genetex.com/Product/Detail/Histone-H3K27ac-Acetyl-Lys27-antibody-MAB10309/GTX50903>  
<https://www.abcam.com/tet2-antibody-ab124297.html>  
<https://www.abcam.com/kdm5a-jarid1a-rbbp2-antibody-ab70892.html>  
<https://www.cellsignal.jp/products/primary-antibodies/utx-d3q1i-rabbit-mab/33510>  
<https://www.citeab.com/antibodies/408081-nb100-2219h-egln1-phd2-antibody-hrp>  
<https://www.abcam.com/lamp1-antibody-1d4b-ab25245.html>  
<https://www.ptglab.com/products/PNPO-Antibody-15552-1-AP.htm>  
<https://www.sigmaaldrich.com/JP/ja/product/sigma/t9026>  
 chrome-extension://efaidnbmnnnibpcajpcglclefindmkaj/https://site.hypoxyprobe.com/knowledge-center-articles/HP-Pab2627-Antibody-Insert.pdf  
<https://www.citeab.com/antibodies/763559-ab109616-anti-hif-2-alpha-antibody>  
<https://www.cellsignal.jp/products/primary-antibodies/p70-s6-kinase-49d7-rabbit-mab/2708>  
<https://www.cellsignal.jp/products/primary-antibodies/phospho-p70-s6-kinase-thr389-108d2-rabbit-mab/9234>

## Eukaryotic cell lines

Policy information about [cell lines and Sex and Gender in Research](#)

## Cell line source(s)

U937--human lung (lymphoblast), HeLa--human cervical cancer.

## Authentication

U937 was not authenticated. HeLa was purchased from RIKEN BRC but not authenticated by ourselves.

## Mycoplasma contamination

U937 and HeLa were verified as negative for mycoplasma infection.

Commonly misidentified lines  
(See [ICLAC](#) register)

Commonly misidentified cell lines were not used in this study.

## Animals and other research organisms

Policy information about [studies involving animals; ARRIVE guidelines](#) recommended for reporting animal research, and [Sex and Gender in Research](#)

## Laboratory animals

4-5 month-old ISAM (Yamazaki et al., Nat Commun 2013; Souma et al., J Am Soc Nephrol 2016) and their control mice for DSS colitis  
 2-3 month-old C57BL/6N mice for hypoxic exposure  
 2-4 month-old wild-type mice, Hif1aF/F:Tie2-Cre mice, Vh1F/F:Lys-Cre mice in C57BL/6 background for culturing bone marrow-derived macrophages  
 2-4 month-old Hif2aF/F:ROSA-CreERT2 mice and Pnpof/F:ROSA-CreERT2 mice in mixed background for culturing bone marrow-derived macrophages  
 These mice were housed in a specific pathogen-free facility and maintained under constant temperature (24 °C), humidity (40%), and a light/dark cycle with 12 hours of light and 12 hours of darkness, with food and water provided ad libitum.

## Wild animals

Not used.

## Reporting on sex

Male ISAM were used for DSS colitis experiment because males exhibit systemic hypoxia with less individual variation than females. Male and female mice were used for hypoxia exposure experiment.

## Field-collected samples

No field collected samples were used in this study.

Ethics oversight

The Standards for Human Care and Use of Laboratory Animals of Tohoku University  
The Guideline at Jichi Medical University upon approval of the Use and Care of Experimental Animals Committee of Jichi Medical University  
The Guidelines for Proper Conduct of Animal Experiments by the Ministry of Education, Culture, Sports, Science, and Technology of Japan

Note that full information on the approval of the study protocol must also be provided in the manuscript.

## Plants

---

Seed stocks

Not applicable.

Novel plant genotypes

Not applicable.

Authentication

Not applicable.
