# Supplementary material for: PNPO–PLP axis senses prolonged hypoxia in macrophages by regulating lysosomal activity
Source: PubMed Central journal article supplement (PMC11599045; doi:10.1038/s42255-024-01053-4), 2024-05-31
Supplement: 42255_2024_1053_MOESM22_ESM.pdf [file 42255_2024_1053_MOESM22_ESM.pdf]

**Figure 3b**

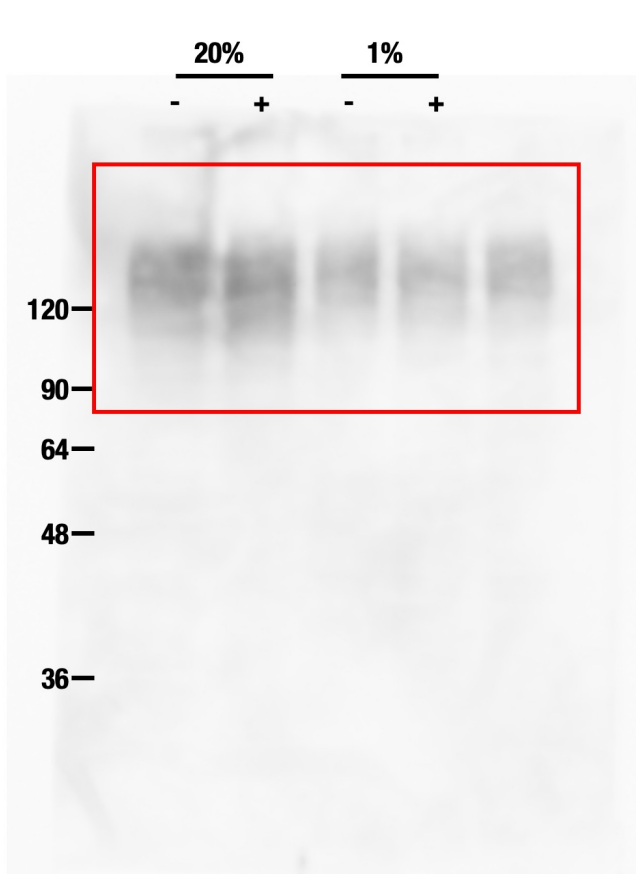

**Lamp1**

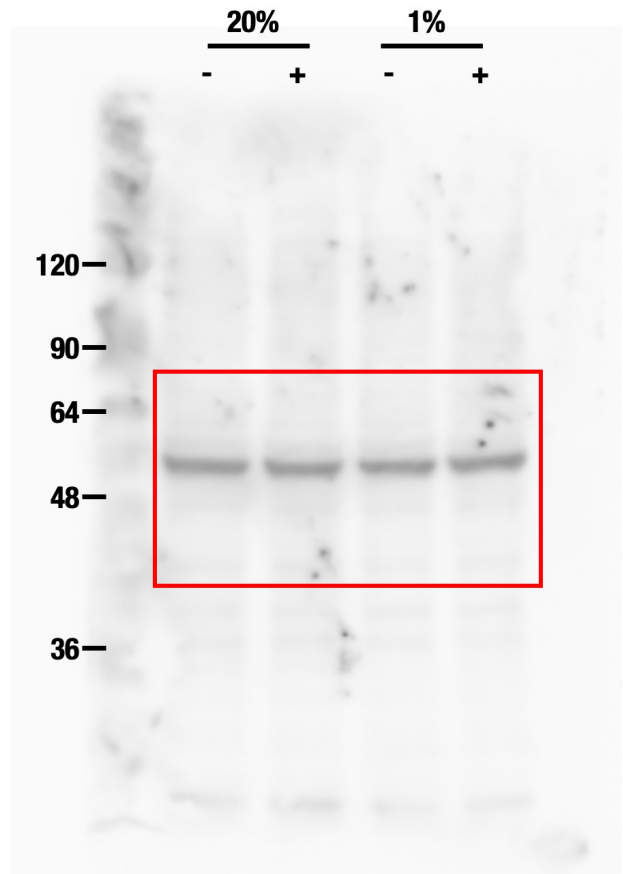

**Tubulin**

Figure 5a

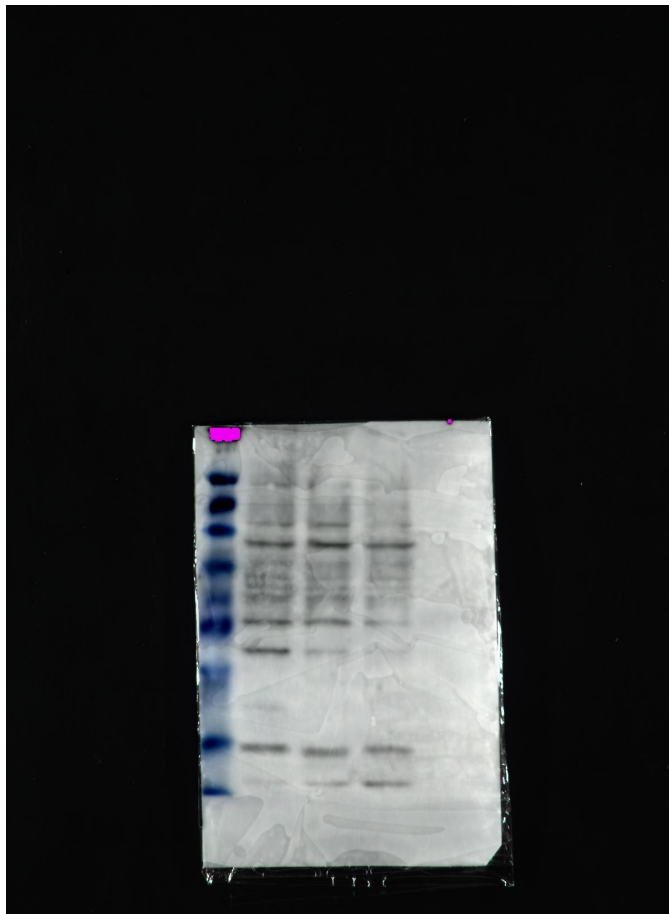

PNPO 30s x 2

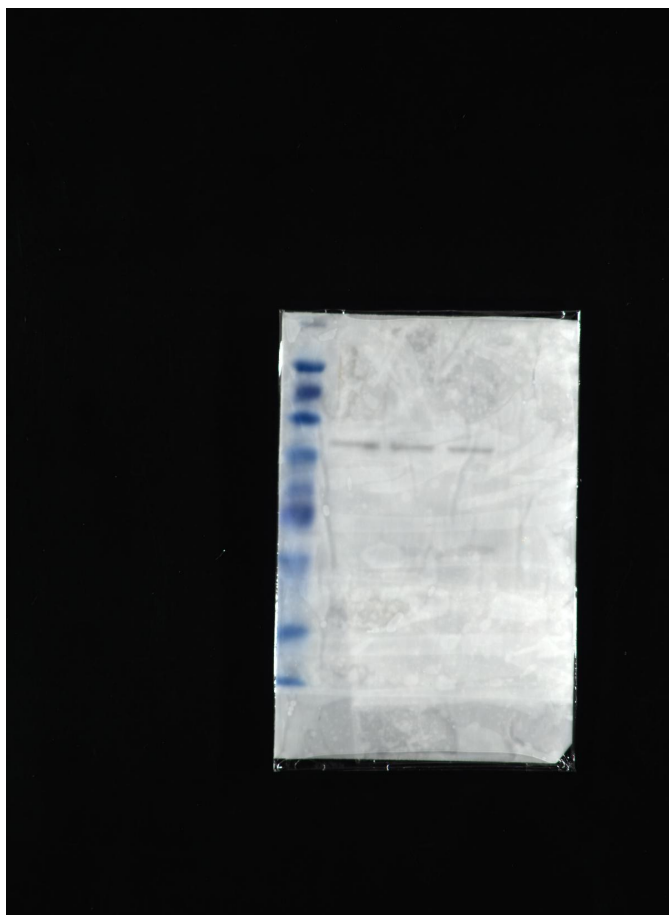

Tubulin 30s x 2

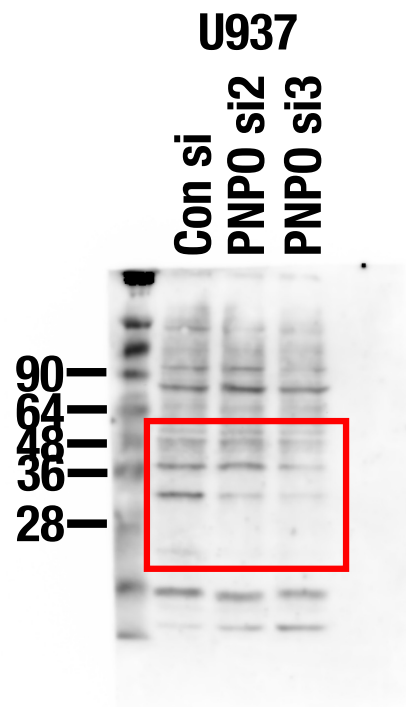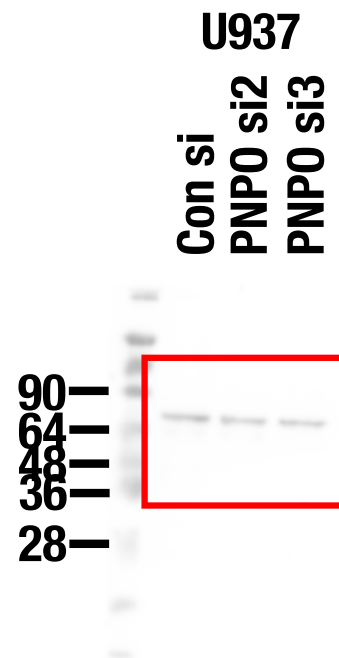

Figure 5c

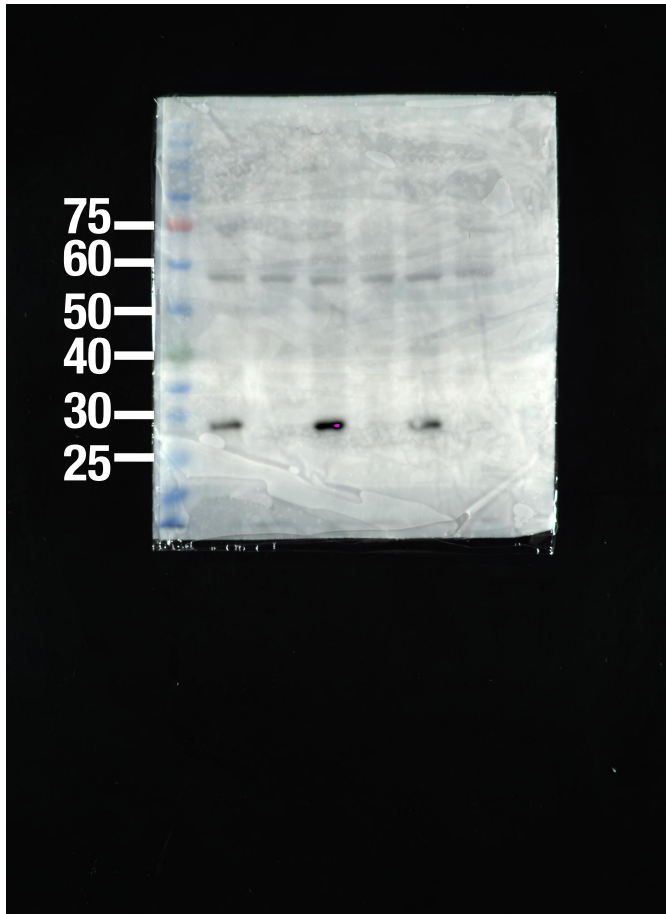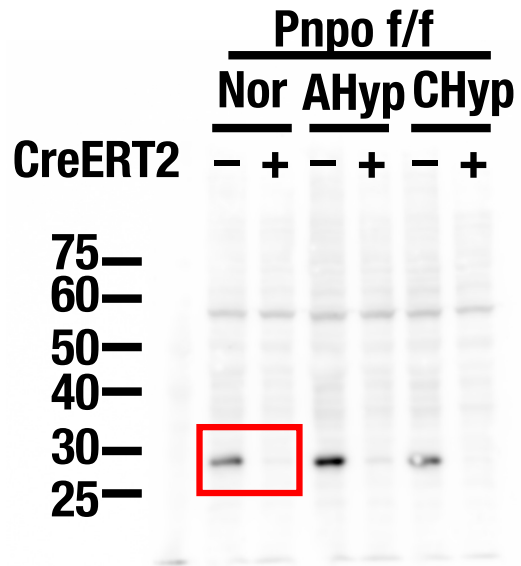

PNPO 10s x 5 2x2 Plus

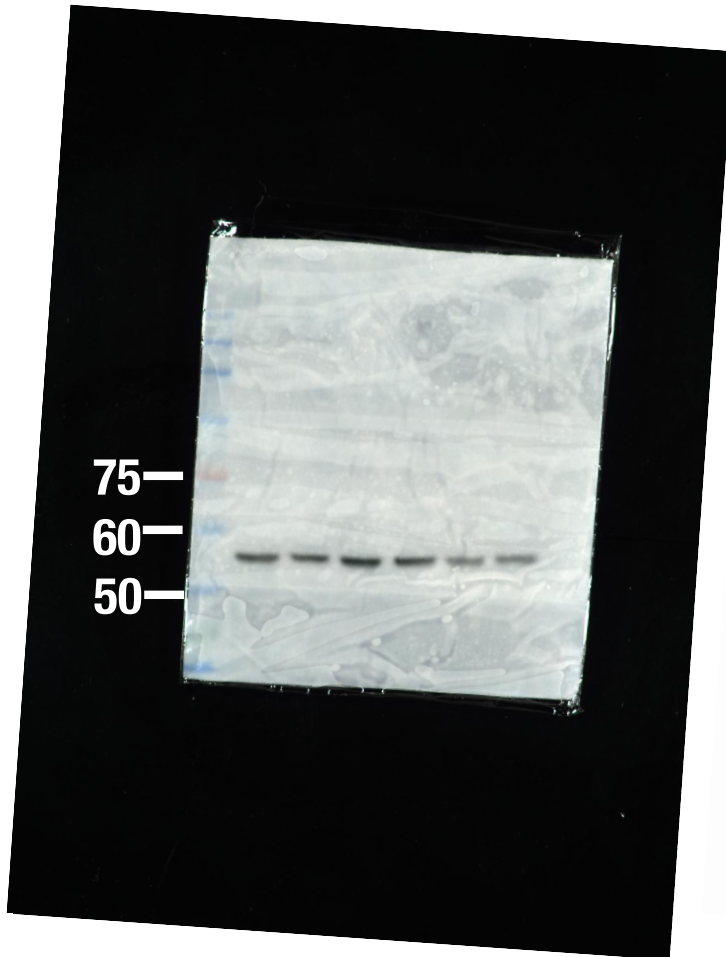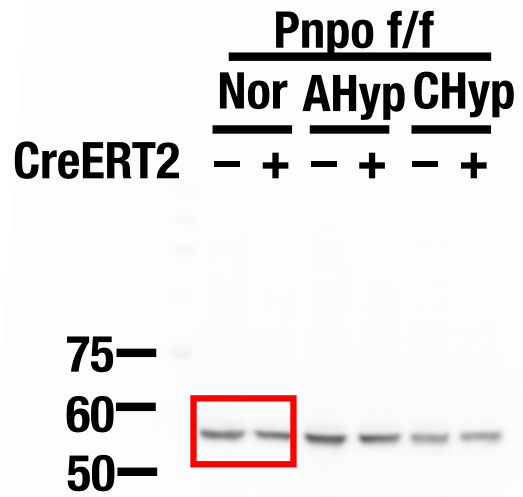

Tubulin 10s x 3

Figure 6c

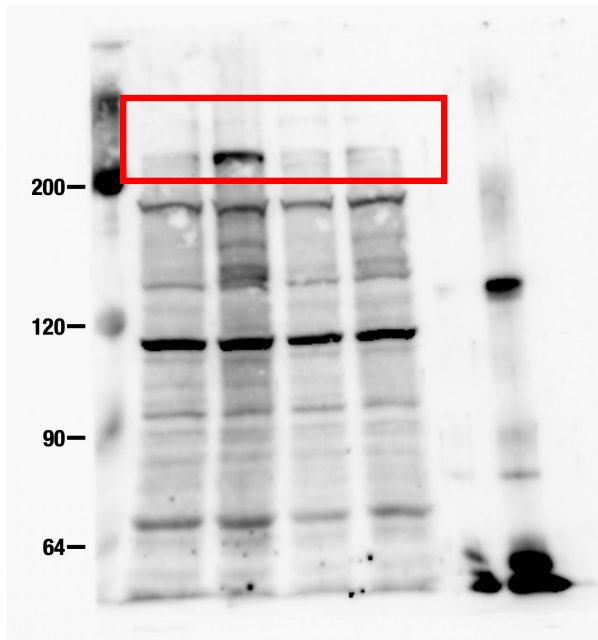

TET2  
230kDa

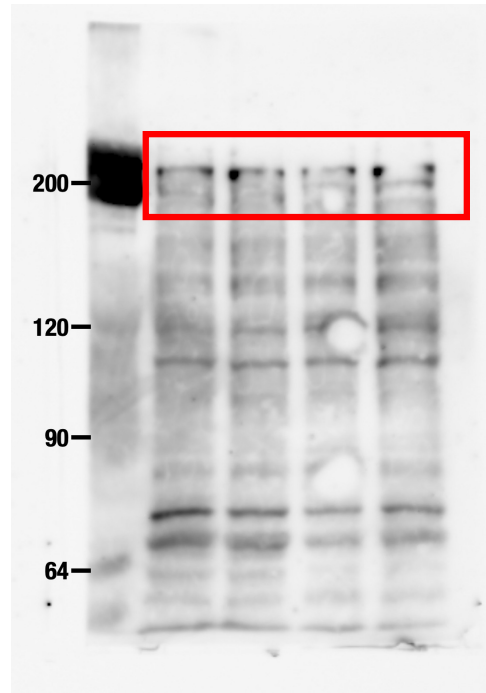

KDM5a  
196kDa

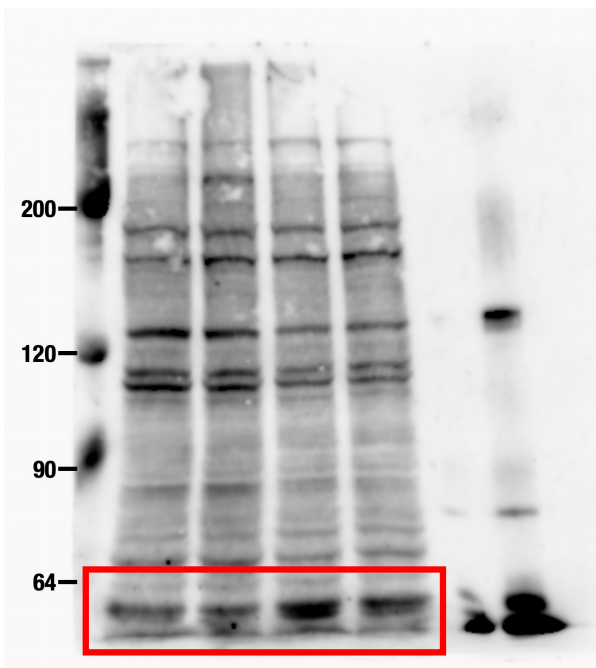

PHD2  
45kDa

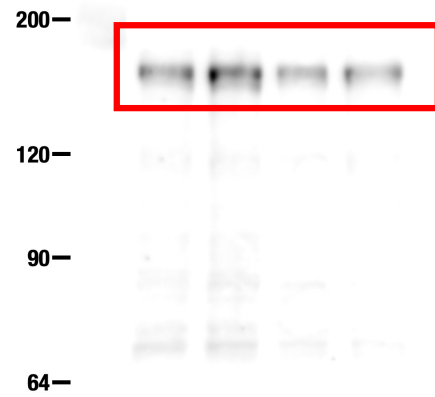

KDM6a  
180kDa

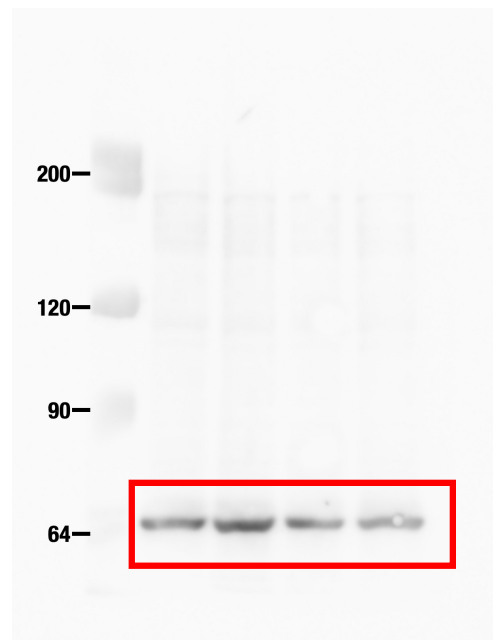

Tubulin  
55kDa

Figure 6g

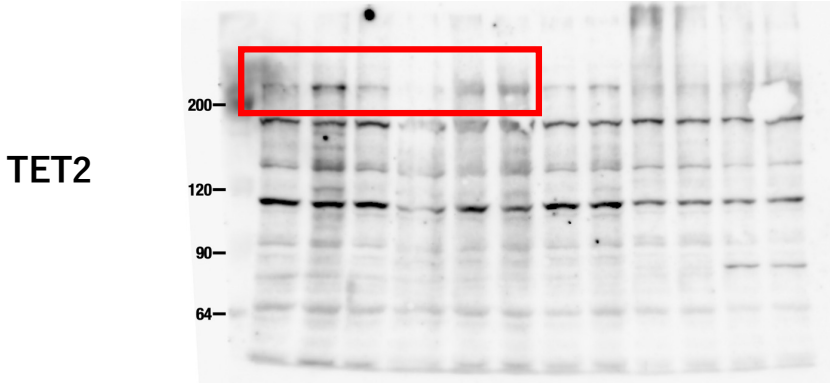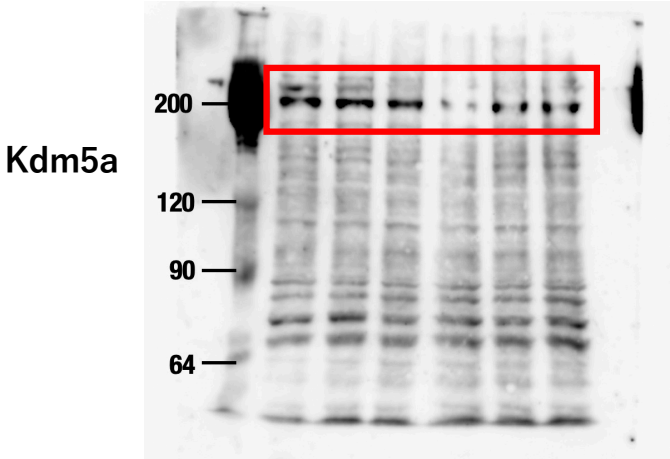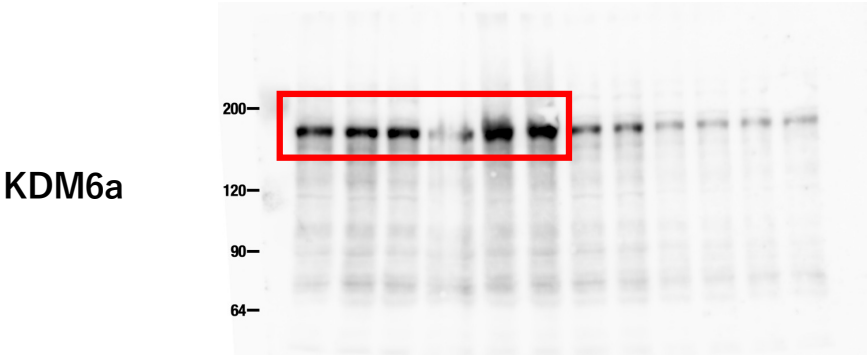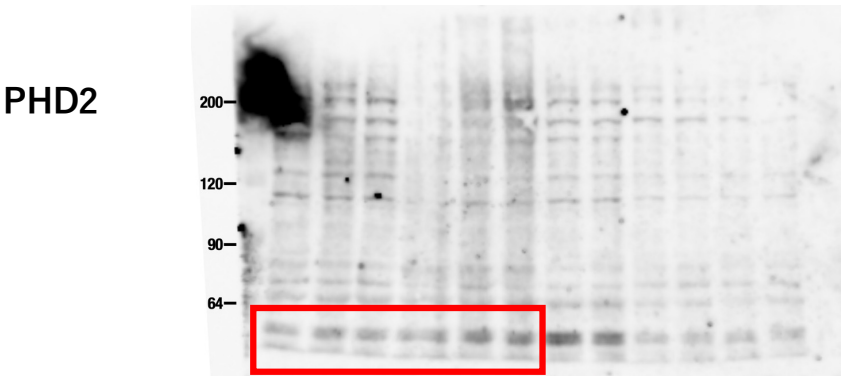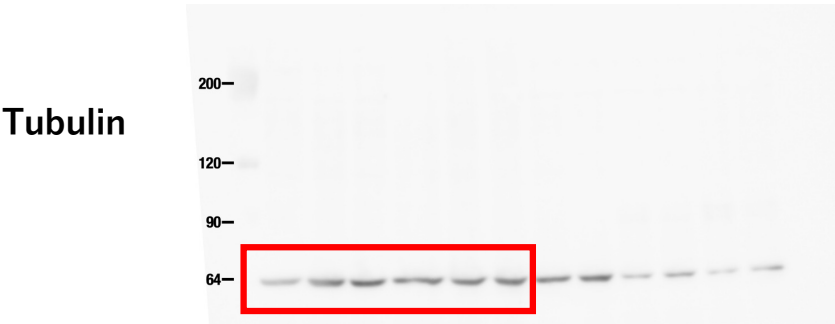

Figure 7b

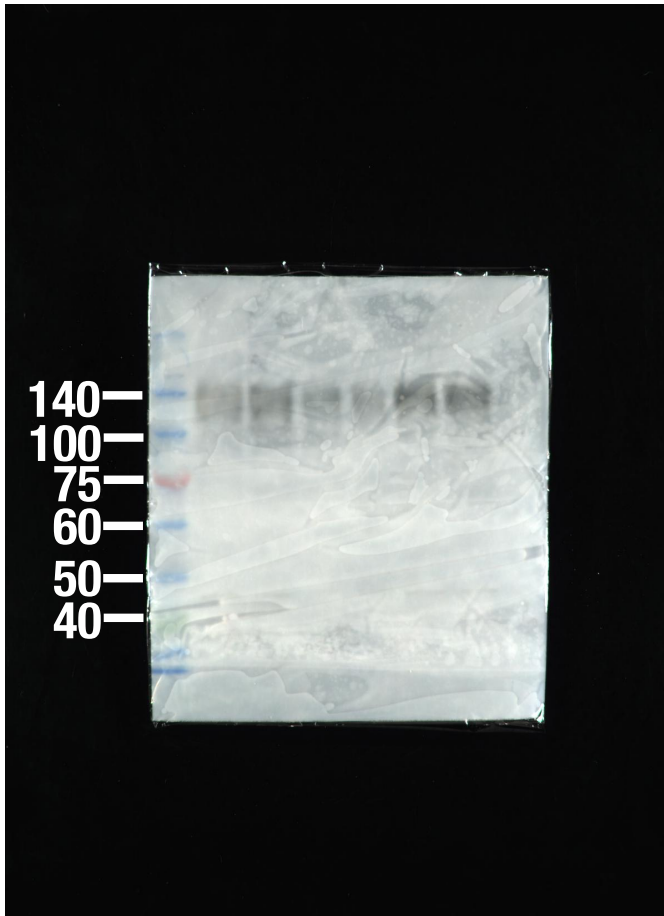

|     | <u>Nor</u> |   | <u>CHyp</u> |   | <u>CHyp</u><br><u>+PL</u> |   |
|-----|------------|---|-------------|---|---------------------------|---|
| LPS | -          | + | -           | + | -                         | + |

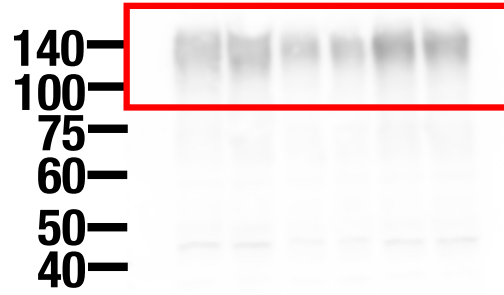

Lamp1 10s x 3

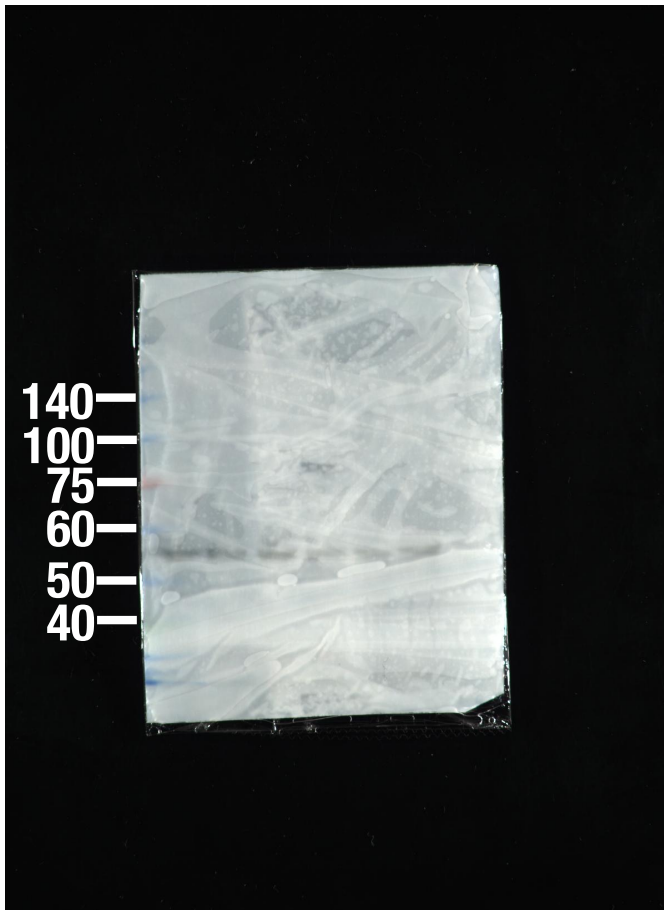

|     | <u>Nor</u> |   | <u>CHyp</u> |   | <u>CHyp</u><br><u>+PL</u> |   |
|-----|------------|---|-------------|---|---------------------------|---|
| LPS | -          | + | -           | + | -                         | + |

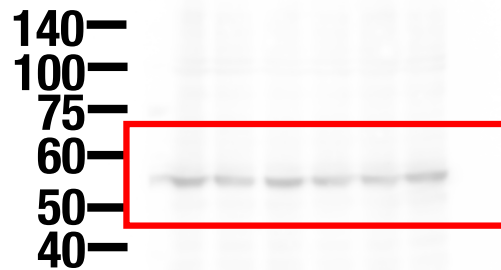

Tubulin 10s x 3

Figure 7d

**TET2**

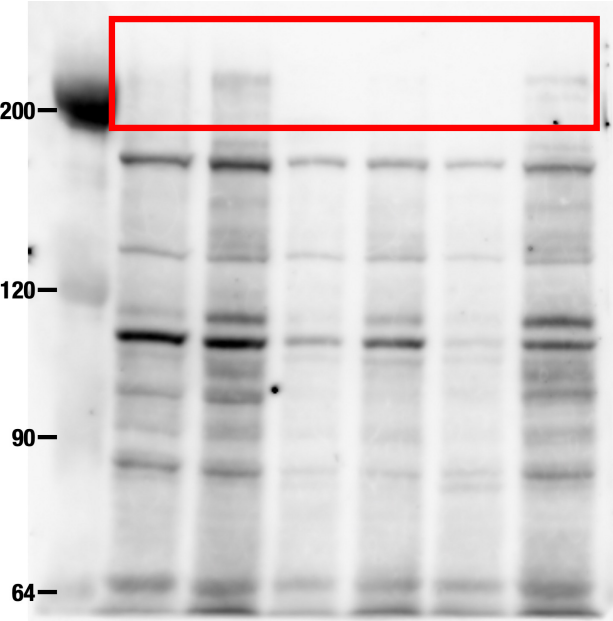

**KDM5A**

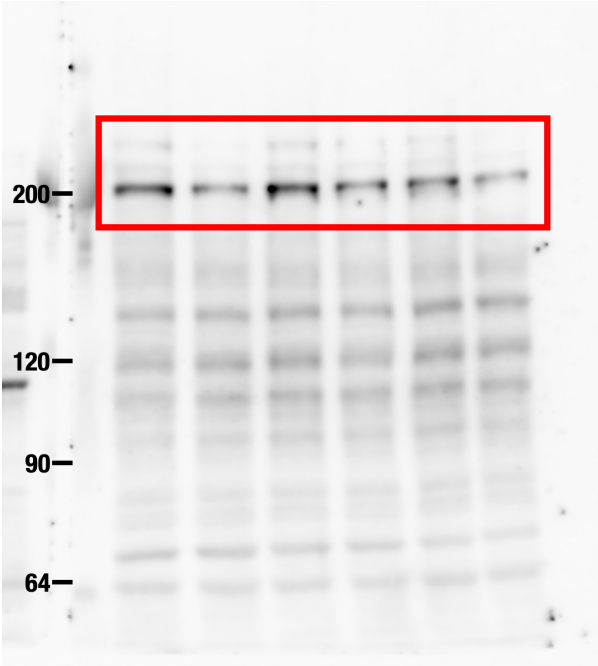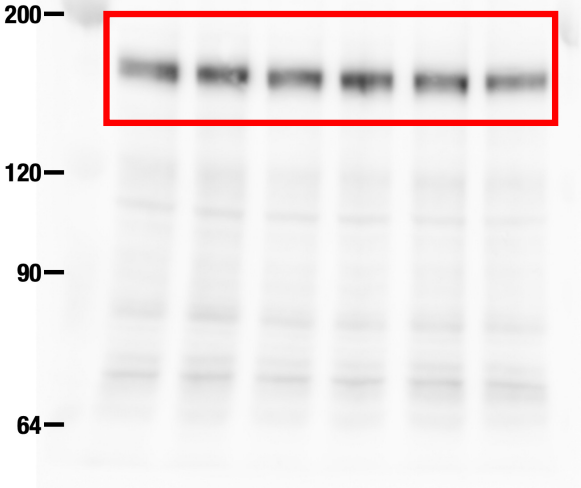

**KDM6A**

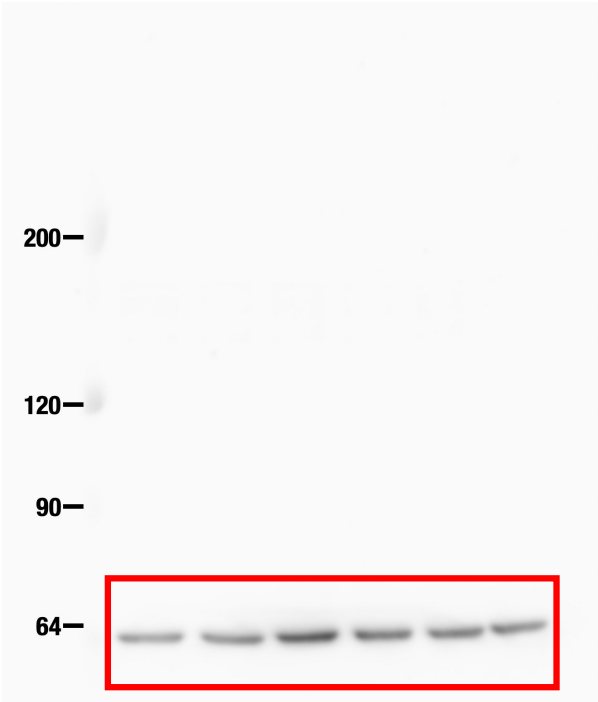

**Tubulin**

**Extended Data Fig. 1b**  
(data shown in Extended Data Fig. 1b are not cropped.)

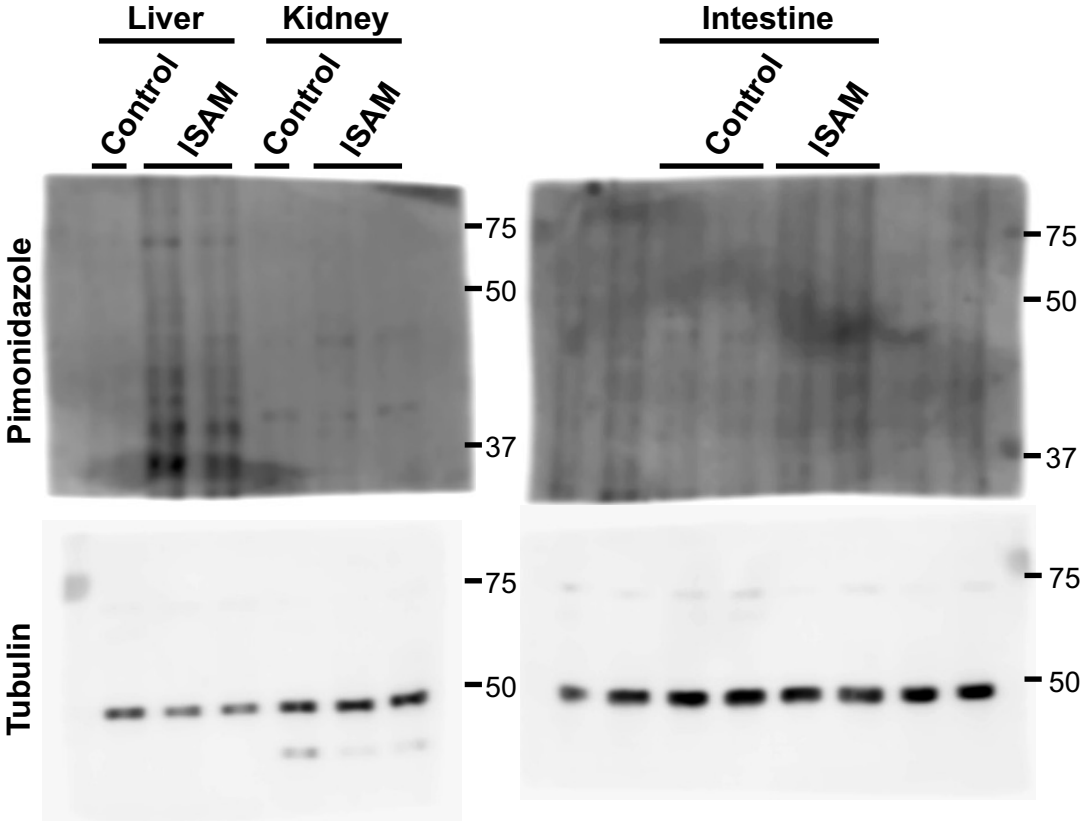



Extended Data Fig. 2e

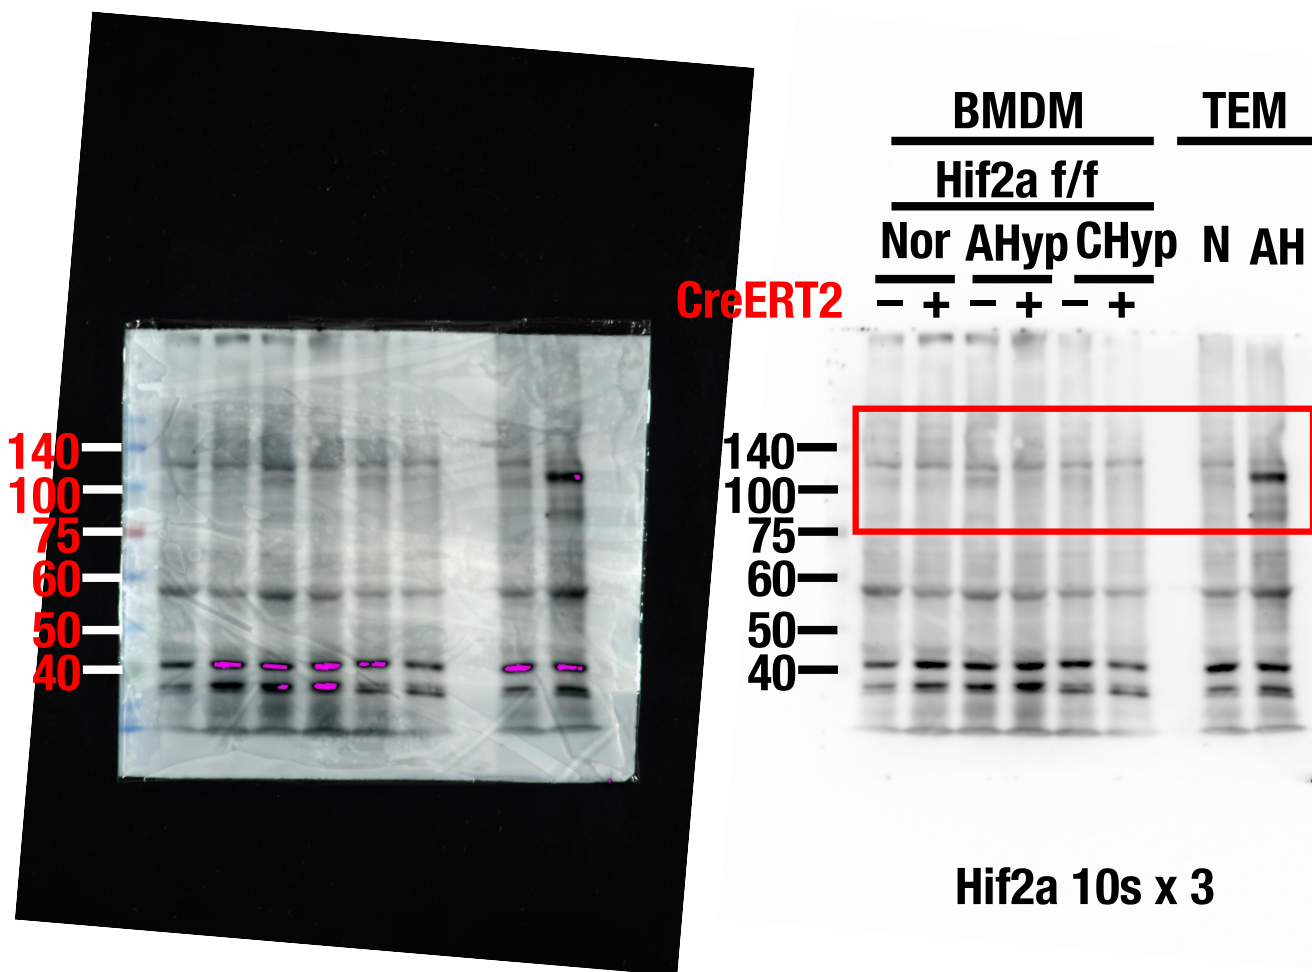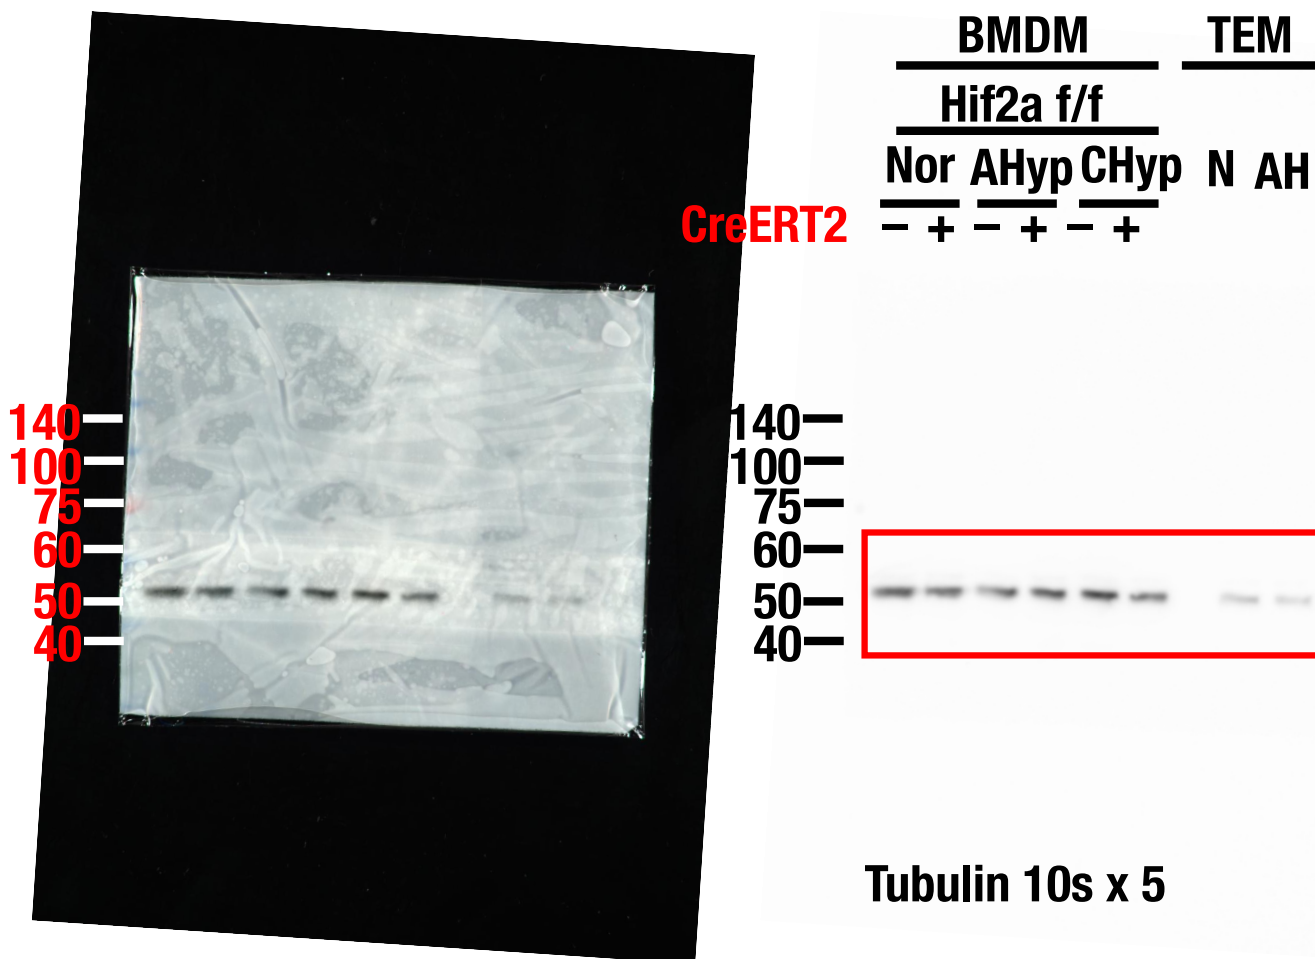

## Extended Data Fig. 2g

---

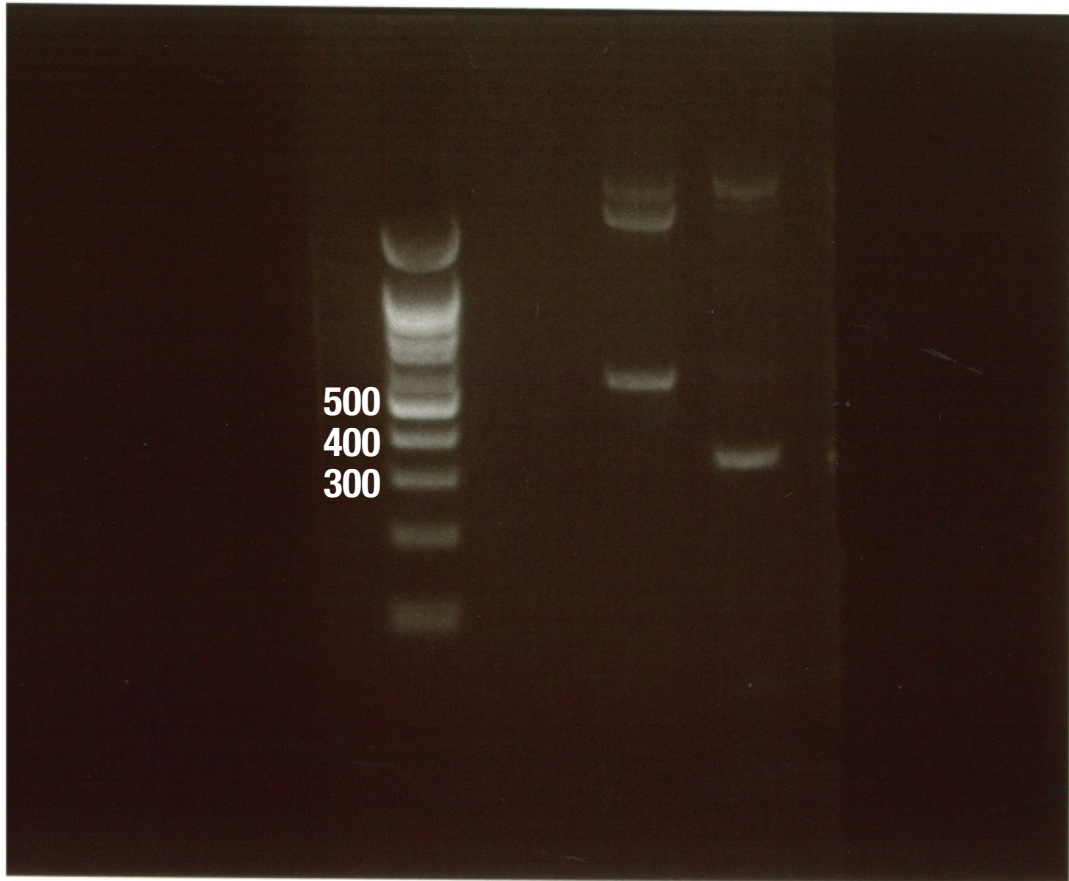

# Extended Data Fig. 5a

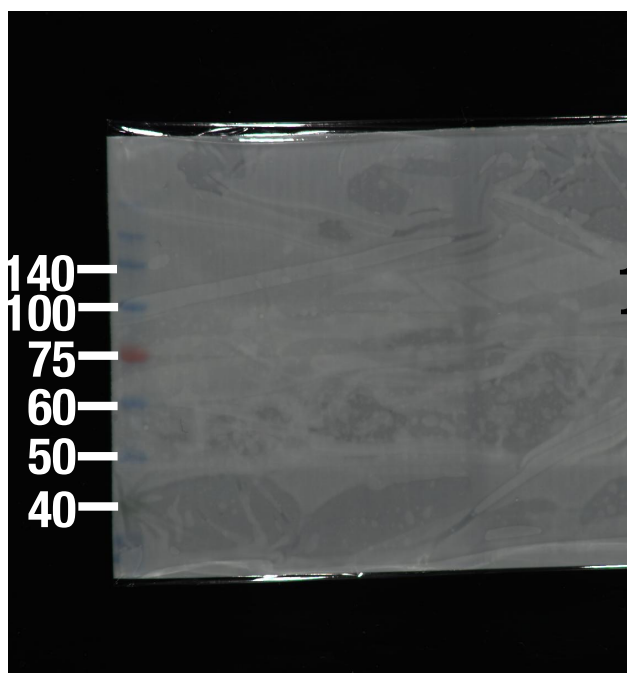

|      | <u>Nor</u> |   | <u>AHyp</u> |   | <u>CHyp</u> |   |   |   |
|------|------------|---|-------------|---|-------------|---|---|---|
| Rapa | -          | - | +           | + | -           | - | + | + |
| LPS  | -          | + | -           | + | -           | + | - | + |

140—  
100—  
75—  
60—  
50—  
40—

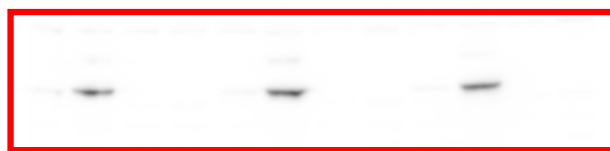

**P-p70S6K (CST9234) 20s x 3**

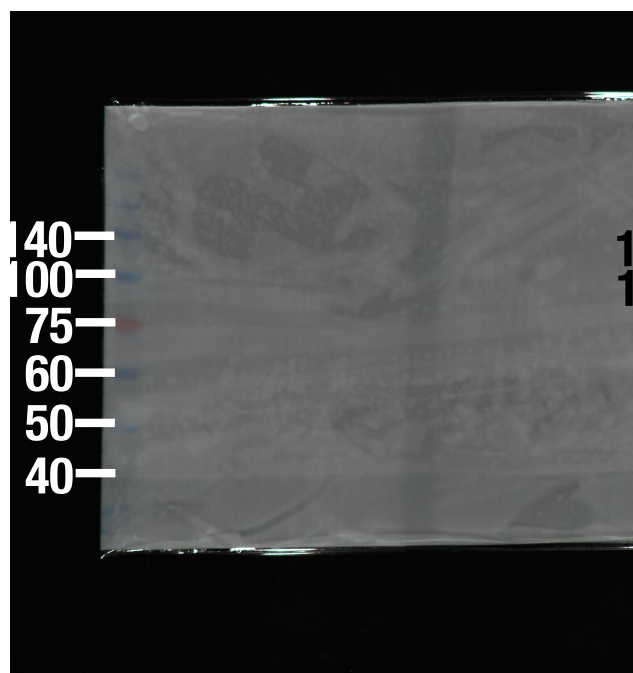

|      | <u>Nor</u> |   | <u>AHyp</u> |   | <u>CHyp</u> |   |   |   |
|------|------------|---|-------------|---|-------------|---|---|---|
| Rapa | -          | - | +           | + | -           | - | + | + |
| LPS  | -          | + | -           | + | -           | + | - | + |

140—  
100—  
75—  
60—  
50—  
40—

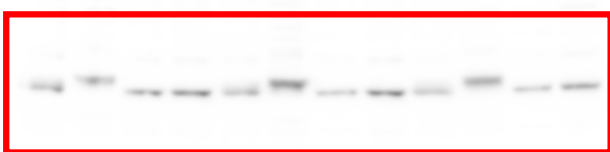

**p70S6K (CST2708) 10s x 3**

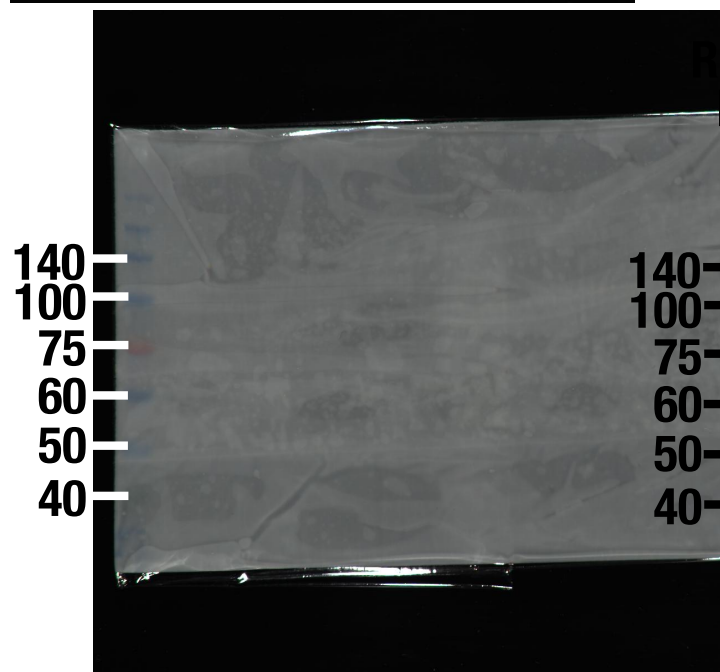

|      | <u>Nor</u> |   | <u>AHyp</u> |   | <u>CHyp</u> |   |   |   |
|------|------------|---|-------------|---|-------------|---|---|---|
| Rapa | -          | - | +           | + | -           | - | + | + |
| LPS  | -          | + | -           | + | -           | + | - | + |

140—  
100—  
75—  
60—  
50—  
40—

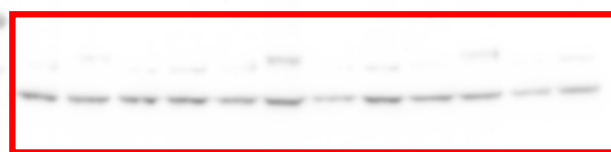

**Tubulin 10s x 2**
